# Supplementary material for: Global Neuromagnetic Cortical Fields Have Non-Zero Velocity
Source: PLOS journal article supplement (doi:10.1371/journal.pone.0148413), 2016-03-08

## Wavelength at peak spatial frequency

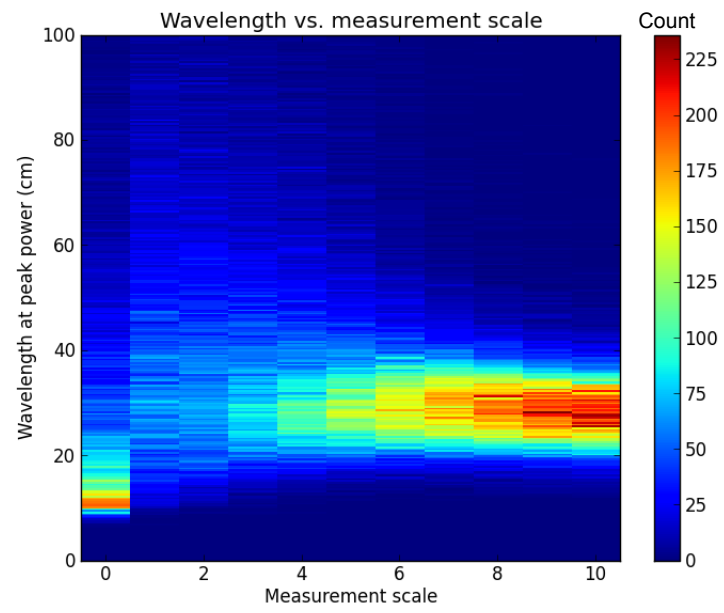

Supplement: S2 (10.1371/journal.pone.0148413.s002) [file journal.pone.0148413.s002]
